# Supplementary material
Source: PubMed Central journal article supplement (PMC3797908)
Supplement: supp_216.21.4082_JEB089508.pdf [file supp_216.21.4082_JEB089508.pdf]

**Supplementary Table S1.** Diapause incidence, percent hatch, and percent embryonation results for each biological replicate. “Library use” represents information on replicates used for sequencing at individual time points.

**Supplementary Table S3.** Genes differentially expressed across all three time periods associated with juvenile hormone metabolism. Homolog descriptions were retrieved from BioMart. Log-fold-change and associated Benjamini-Hochberg corrected p-values are given for each time period. “Other evidence” refers to additional annotation information used to functionally characterize each gene.

**Supplementary Table S4.** Differentially expressed genes in significantly enriched GO-Slim categories or Kegg pathways. Homolog descriptions and Biotypes were downloaded from BioMart. Log-fold-change and associated Benjamini-Hochberg corrected p-values are listed for each time period, as is the time period in which the category was significantly enriched.

[Download Table S1, 3 and 4](#)

**Supplemental Table 2.** Information associated with each gene included in the differential expression analysis. The established homolog and its description and biotype, log-fold-changes and p-values at each data collection time point, and normalized expression values for each library are given.

[Download Table S2](#)
